# Supplementary material
Source: ML conference proceedings conference paper supplement (https://proceedings.neurips.cc/paper_files/paper/2020/hash/a6d259bfbfa2062843ef543e21d7ec8e-Abstract.html)
Supplement: Supplementary file [file a6d259bfbfa2062843ef543e21d7ec8e-Supplemental.zip]

# Appendix

## 1 Cleaner view of Table 2 (Due to Formatting Issues in Main Paper)

| Dataset                              | $\alpha$ | cost         |        |       |              | $\mathcal{E}$ |        |          |          | runtime(s)    |        |              |       |
|--------------------------------------|----------|--------------|--------|-------|--------------|---------------|--------|----------|----------|---------------|--------|--------------|-------|
|                                      |          | us           | greedy | A     | B            | us            | greedy | A        | B        | us            | greedy | A            | B     |
| reuters                              | 0.05     | <b>1.858</b> | 1.593  | 3.679 | 1.865        | 1             | 18     | <b>0</b> | 2        | 77.661        | 0.173  | <b>51.54</b> | 61.77 |
|                                      | 0.20     | <b>1.573</b> | 1.575  | 3.278 | 1.604        | 1             | 10     | <b>0</b> | <b>0</b> | <b>30.085</b> | 0.172  | 44.68        | 53.56 |
|                                      | 0.40     | <b>1.540</b> | 1.582  | 3.278 | 1.604        | 1             | 3      | <b>0</b> | 1        | <b>34.922</b> | 0.174  | 47.19        | 53.26 |
| victorian                            | 0.1      | 4.698        | 3.240  | 6.958 | <b>4.602</b> | 2             | 35     | <b>0</b> | 1        | 158.2         | 0.314  | <b>89.65</b> | 180.3 |
|                                      | 0.3      | <b>3.868</b> | 3.108  | 7.612 | 4.174        | 1             | 21     | <b>0</b> | 1        | <b>81.53</b>  | 0.309  | 88.87        | 165.6 |
|                                      | 0.5      | <b>3.580</b> | 3.228  | 6.958 | 3.820        | 1             | 8      | <b>0</b> | <b>0</b> | <b>76.88</b>  | 0.308  | 81.16        | 142.3 |
| 4area                                | 0.45     | <b>9.421</b> | 9.786  | 19.13 | 9.768        | 2             | 31     | <b>0</b> | <b>0</b> | <b>14.51</b>  | 2.283  | 393.1        | 1190  |
|                                      | 0.60     | 9.891        | 9.535  | 18.90 | <b>9.768</b> | <b>0</b>      | 0      | <b>0</b> | <b>0</b> | <b>12.96</b>  | 2.237  | 370.4        | 1276  |
|                                      | 0.80     | <b>9.671</b> | 9.762  | 14.02 | 9.768        | <b>0</b>      | 0      | <b>0</b> | <b>0</b> | <b>12.06</b>  | 2.224  | 362.4        | 1205  |
| bank<br>,cost x10 <sup>4</sup>       | 0.80     | <b>2.914</b> | 0.133  | N/A   | 7.450        | <b>1</b>      | 1      | N/A      | 504      | <b>2.941</b>  | 0.292  | N/A          | 117.5 |
|                                      | 0.90     | <b>2.914</b> | 0.133  | N/A   | 7.450        | <b>1</b>      | 1      | N/A      | 231      | <b>2.940</b>  | 0.291  | N/A          | 117.9 |
|                                      | 1.00     | <b>0.121</b> | 0.127  | N/A   | N/A          | <b>0</b>      | 0      | N/A      | N/A      | <b>2.496</b>  | 0.289  | N/A          | N/A   |
| census<br>,cost x10 <sup>4</sup>     | 0.86     | <b>118.5</b> | 58.34  | N/A   | TLE          | <b>0</b>      | 129    | N/A      | TLE      | <b>19.83</b>  | 2.153  | N/A          | TLE   |
|                                      | 0.90     | <b>118.5</b> | 57.33  | N/A   | TLE          | <b>0</b>      | 1      | N/A      | TLE      | <b>19.63</b>  | 2.168  | N/A          | TLE   |
|                                      | 0.94     | <b>118.5</b> | 59.87  | N/A   | TLE          | <b>1</b>      | 1      | N/A      | TLE      | <b>20.11</b>  | 2.144  | N/A          | TLE   |
| creditcard<br>,cost x10 <sup>4</sup> | 0.60     | <b>124.5</b> | 56.02  | N/A   | TLE          | <b>1</b>      | 15     | N/A      | TLE      | <b>26.49</b>  | 2.472  | N/A          | TLE   |
|                                      | 0.70     | <b>124.5</b> | 58.22  | N/A   | TLE          | <b>1</b>      | 1      | N/A      | TLE      | <b>26.78</b>  | 2.456  | N/A          | TLE   |
|                                      | 0.80     | <b>124.5</b> | 56.85  | N/A   | TLE          | <b>1</b>      | 1      | N/A      | TLE      | <b>26.83</b>  | 2.485  | N/A          | TLE   |

Note than in the table above. We bold the winner of cost,  $\mathcal{E}$ , and runtime between our algorithm, as well as Ahmadian et al and Bera et al algorithm. The Greedy algorithm is not included as it is not a fair algorithm as seen from its  $\mathcal{E}$ , but is left for comparison purposes.

## Appendix A

**Lemma 1.** Given a set of  $k$ -centers  $S$ , and an associated  $\lambda$ -Venn diagram  $R$ . Denote  $2^S$  as the powerset of  $S$ , then the following holds

1. For non-empty  $A, A' \subset S, A \neq A'$ , we must have  $J_A \cap J_{A'} = \emptyset$
2. The union of all joiners partitions  $R$ :  $R = \bigcup_{A \in 2^S, A \neq \emptyset} J_A$
3. The number of non empty joiners is at most  $\min(2^k - 1, N)$

*Proof.* 1) Without loss of generality, assume  $|A| \leq |A'|$ . Since  $A' \neq A$ , there exists an  $i \in A'$  such that  $i \notin A$ , or equivalently,  $i \in S - A$ . Now take any point  $x \in J_{A'}$ . By definition,  $x \in B(i, \lambda)$  must be true. However, using the fact that a point in  $J_A$  must belong to the region  $\overline{B(i, \lambda)}$ , it follows that  $x$  cannot belong to  $J_A$

2) Take any point  $x \in R$ . Let  $A$  be the set of centers  $A \subset S$  that satisfy  $d(i, x) \leq \lambda$ . Then the set of centers in  $j \in S - A$  satisfy  $d(i, x) > \lambda$ . This implies that  $x$  belongs to  $J_A$  by the definition of  $J_A$ . Since  $A \in 2^S, A \neq \emptyset$ , then  $x$  belongs to the union of joiners. Also note using (1) that the joiners are disjoint, so they partition  $R$ .

3) There are at most  $2^k - 1$  non-empty elements in the power set of  $S$ . However, every point from the  $N$  points belongs to one joiner only (using (1)). This means that the number of non empty joiners is bounded by the number of points,  $N$ . The result follows.  $\square$

| Region, Color             | Number of Points | Region, Color               | Number of Points |
|---------------------------|------------------|-----------------------------|------------------|
| $J_{\{1\}}, \text{Red}$   | 1                | $J_{\{3\}}, \text{Green}$   | 2                |
| $J_{\{1\}}, \text{Green}$ | 2                | $J_{\{3\}}, \text{Blue}$    | 1                |
| $J_{\{1\}}, \text{Blue}$  | 1                | $J_{\{1,3\}}, \text{Blue}$  | 1                |
| $J_{\{2\}}, \text{Red}$   | 2                | $J_{\{2,3\}}, \text{Red}$   | 1                |
| $J_{\{2\}}, \text{Green}$ | 1                | $J_{\{2,3\}}, \text{Blue}$  | 1                |
| $J_{\{2\}}, \text{Blue}$  | 1                | $J_{\{1,2,3\}}, \text{Red}$ | 1                |
| $J_{\{3\}}, \text{Red}$   | 1                |                             |                  |

Table 1: Frequency for each Joiner-color pair.

## Appendix B

**Lemma 2.** *The number of variables is at most  $\min(2^{k-1}k|I|, Nk)$*

*Proof.* For a fixed signature  $c \in I$ , and a set  $A \subset S$  of size  $i$ , there are at most  $i$  LP variables  $\{x_{c,A,j} | j \in A\}$ . There are  $\binom{k}{i}$  sets of size  $i$ , so there are at most  $|I|\binom{k}{i}i$  variables for sets of size  $i$ . Summing this up over the set sizes, we get an upper bound on the number of variables

$$\sum_{i=1}^k |I|\binom{k}{i}i = 2^{k-1}k|I|$$

However, each point in the input belongs to one, and only one set  $L(a, A)$  (since a point has 1 signature, and belongs to 1 joiner  $J_A$ ), leading to at most  $N$  pairs  $(a, A)$  satisfying  $|L(a, A)| > 0$ . For each pair  $(a, A)$ , there could be at most  $k$  variables  $\{x_{a,A,j} | j \in A\}$ , which bounds the number of variables by  $Nk$ . Combining the two bounds yields the required result.  $\square$

Now, we bound the number of constraints

**Lemma 3.** *The number of constraints is at most  $kl + \min(2^k|I|, Nk) + \min(2^{k-1}k|I|, Nk)$*

*Proof.* For the set of constraints (1), there are  $kl$  constraints.

For the set of constraints (2), There are  $|I|$  signatures, and at most  $2^k$  possible  $A$ , so at most  $2^k|I|$  constraints.

However, each point belongs to one, and only one of  $L(a, A)$ , leading to at most  $N$  pairs  $(a, A)$  satisfying  $|L(a, A)| > 0$ , which bounds the number of constraints by  $Nk$ .

Finally, from Lemma 2, there are at most  $\min(2^{k-1}k|I|, Nk)$  variables, and thus at most  $\min(2^{k-1}k|I|, Nk)$  for the set of constraints (3).

Combining the bounds for all sets of constraints, we get the desired result.  $\square$

## Appendix C

In this section, we show the **frequency-distributor** linear program for the example in Figure 1 in the paper. There are 3 non overlapping groups, Red, Green, and Blue. Thus, the signature of any point is of length 1. We also set  $F = C, k = 3, \beta_g = 0, \alpha_g = \alpha$ . Suppose that the initial centers returned by the greedy algorithm are the points  $S = \{3, 7, 13\}$ .

For each point  $x_i$ , make a list  $S' \subset S$  of cluster centers  $j$  such that  $d(x_i, j) \leq \lambda \iff j \in S'$ . In other words,  $S'$  are the cluster centers reachable from  $x_i$ . Associate the point  $x_i$  and its color with  $S'$ . A straightforward implementation with a hash map would take  $O(Nk)$  time. Table 1 shows a summary after the  $O(Nk)$  computation. Notice that  $J_{\{1,2\}}$  is missing from the hash map. This is because no point belongs to  $J_{\{1,2\}}$ .

Finally, we define the corresponding 18 LP variables to the region color pairs in Table 1 (We abbreviate Red, Green, and Blue with R,G,B respectively):

$$\{x_{R,\{1\},1}, x_{G,\{1\},1}, x_{B,\{1\},1}, x_{R,\{2\},2}, x_{G,\{2\},2}, x_{B,\{2\},2}, x_{R,\{3\},3}, x_{G,\{3\},3}, x_{B,\{3\},3}, x_{B,\{1,3\},1}, x_{B,\{1,3\},3}, x_{R,\{2,3\},2}, x_{R,\{2,3\},3}, x_{B,\{2,3\},2}, x_{B,\{2,3\},3}, x_{R,\{1,2,3\},1}, x_{R,\{1,2,3\},2}, x_{R,\{1,2,3\},3}\}$$

These define the following **frequency-distributor** LP:

$$\begin{aligned}
& \min 1 \\
& x_{R,\{1,2,3\},1} + x_{R,\{1\},1} \leq \alpha(x_{R,\{1,2,3\},1} + x_{R,\{1\},1} + x_{G,\{1\},1} + x_{B,\{1\},1} + x_{B,\{1,3\},1}) \\
& x_{G,\{1\},1} \leq \alpha(x_{R,\{1,2,3\},1} + x_{R,\{1\},1} + x_{G,\{1\},1} + x_{B,\{1\},1} + x_{B,\{1,3\},1}) \\
& x_{B,\{1\},1} + x_{B,\{1,3\},1} \leq \alpha(x_{R,\{1,2,3\},1} + x_{R,\{1\},1} + x_{G,\{1\},1} + x_{B,\{1\},1} + x_{B,\{1,3\},1}) \\
\\
& x_{R,\{2,3\},2} + x_{R,\{1,2,3\},2} + x_{R,\{2\},2} \leq \alpha(x_{R,\{2,3\},2} + x_{R,\{1,2,3\},2} + x_{R,\{2\},2} + x_{G,\{2\},2} + x_{B,\{2,3\},2} + x_{B,\{2\},2}) \\
& x_{G,\{2\},2} \leq \alpha(x_{R,\{2,3\},2} + x_{R,\{1,2,3\},2} + x_{R,\{2\},2} + x_{G,\{2\},2} + x_{B,\{2,3\},2} + x_{B,\{2\},2}) \\
& x_{B,\{2,3\},2} + x_{B,\{2\},2} \leq \alpha(x_{R,\{2,3\},2} + x_{R,\{1,2,3\},2} + x_{R,\{2\},2} + x_{G,\{2\},2} + x_{B,\{2,3\},2} + x_{B,\{2\},2}) \\
\\
& x_{R,\{2,3\},3} + x_{R,\{1,2,3\},3} + x_{R,\{3\},3} \leq \alpha(x_{R,\{2,3\},3} + x_{R,\{1,2,3\},3} + x_{R,\{3\},3} + x_{G,\{3\},3} + x_{B,\{1,3\},3} + x_{B,\{2,3\},3} + x_{B,\{3\},3}) \\
& x_{G,\{3\},3} \leq \alpha(x_{R,\{2,3\},3} + x_{R,\{1,2,3\},3} + x_{R,\{3\},3} + x_{G,\{3\},3} + x_{B,\{1,3\},3} + x_{B,\{2,3\},3} + x_{B,\{3\},3}) \\
& x_{B,\{1,3\},3} + x_{B,\{2,3\},3} + 1 \leq \alpha(x_{R,\{2,3\},3} + x_{R,\{1,2,3\},3} + x_{R,\{3\},3} + x_{G,\{3\},3} + x_{B,\{1,3\},3} + x_{B,\{2,3\},3} + x_{B,\{3\},3}) \\
\\
& x_{B,\{1,3\},1} + x_{B,\{1,3\},3} = 1 \\
& x_{B,\{2,3\},2} + x_{B,\{2,3\},3} = 1 \\
& x_{R,\{2,3\},2} + x_{R,\{2,3\},3} = 1 \\
& x_{R,\{1,2,3\},1} + x_{R,\{1,2,3\},2} + x_{R,\{1,2,3\},3} = 1 \\
\\
& x_{R,\{1\},1} = 1, x_{G,\{1\},1} = 2, x_{B,\{1\},1} = 1 \\
& x_{R,\{2\},2} = 2, x_{G,\{2\},2} = 1, x_{B,\{2\},2} = 1 \\
& x_{R,\{3\},3} = 1, x_{G,\{3\},3} = 1, x_{B,\{3\},3} = 1 \\
\\
& \mathbf{x} \geq \mathbf{0}
\end{aligned}$$

Once we have solved the linear program, then for each point  $x_i \in C$ , suppose the point has color  $c$ , and belongs to  $J_A$ . Then assign the point to cluster  $j \in A$  with probability  $\frac{x_{c,A,j}}{|L(c,A)|}$ . Then on expectation, each cluster would receive  $x_{c,A,j}$  points from  $L(c,A)$ . This leads to a solution that respects the constraints on expectation. Indeed solving the LP above and doing the randomized assignment results in  $\mathcal{E} = 0$  in 1000 random assignments.

## Appendix D: Runtime Analysis

Denote  $LP(m,n)$  as the time needed to solve a linear programming problem with  $m$  variables and  $n$  constraints. In Algorithm 1, The basic implementation of the greedy  $k$ -center algorithm takes  $O(Nkd)$  time, where  $d$  is the dimension of the input points. The distance matrix  $distance\_matrix(X,S)$  calculation takes  $O(Nkd)$  time. In addition, there are  $O(\log \frac{\max(d)}{\epsilon})$  binary search iterations. In each iteration, Lines 8–11 of Algorithm 1 takes  $O(Nk)$  time. The frequency-distributor LP can be constructed in  $O(Nkl)$  time (basic implementation without any special data structures to build the LP) and solved in  $LP(\min(2^{k-1}k|I|, Nk), kl + \min(2^k|I|, Nk) + \min(2^{k-1}k|I|, Nk))$ . For small  $k, I, l$ , the number of variables and constraints is very small which leads to a very fast construction and feasibility check for the LP.

Hence, the entire algorithm takes on a worse case scenario  $O(Nkd + \log(\frac{\max(d)}{\epsilon})(Nkl + LP(Nk, 3Nk)))$ .
